# Supplementary material
Source: PubMed Central journal article supplement (PMC3102382)
Supplement: 1018938108_pnas.201018938SI.pdf [file 1018938108_pnas.201018938SI.pdf]

# Supporting Information

Pinhasi et al. 10.1073/pnas.1018938108

## SI Methods

Collagen was extracted using the methods outlined by Bronk Ramsey et al. (1), Higham et al. (2), and Brock et al. (3). All collagen was obtained using a final ultrafiltration step after Brown et al. (4). This method has been shown to improve the reliability of the ages obtained by more effectively removing low-molecular weight contaminants (4, 5). Radiocarbon ( $^{14}\text{C}$ ) ages are given as conventional ages BP after Stuiver and Polach (6). The  $^{14}\text{C}$  ages have been corrected for laboratory pretreatment background using a bone-specific background correction (main text and ref. 7).

There is variability in the sequence of  $^{14}\text{C}$  determinations throughout the site. In layer 3, for instance, Ua-14512 ( $29,195 \pm 965$  BP) was dated in the same layer as two dates published here of  $>45.2$  and  $>46.1$  ka BP. There are at least two explanations. The difference may be due to contamination for the former and improved pretreatment chemistry for the latter measurements. Higham et al. (2) show using material dated from several sites that ultrafiltration is a more effective method in most instances for removing low-level contaminants than other methods, such as the Longin collagen (gelatinization) method. There is a growing realization of the challenge and difficulties associated with reli-

able dating in the 30–60 ka BP window (e.g., 8). The differences, then, may therefore reflect residual contamination in the younger measurement. A perusal of the other determinations from higher layers unfortunately shows several similar cases. For example, in layer 2A, two determinations from Beta Analytic differ by several thousand years from two other determinations in the same layer, and appear young compared with results from higher layers.

A note of caution is required regarding the calibration of ages close to the maximum dating limit of the Oxford laboratory, the limit of the IntCal09 curve, and similarly to the curve itself, which is unlikely to be the final iteration. The curve is based on an amalgamation of datasets, most of which are marine records. We have yet to obtain a firm terrestrial-based sequence for age calibration, although the Lake Suigetsu record of Japan is expected to produce that sequence within the next few years (9). We use this curve in the interim, recognizing that updated records may require us to undertake further modeling work. Calibrated ages BP for the determinations from layer 2 and from the Mez 2 specimen are shown in Table S1.

Results of the Bayesian modeling, as discussed in the main text, are shown in Figs. S1 and S2.

1. Bronk Ramsey C, Higham TFG, Bowles A, Hedges REM (2004) Improvements to the pretreatment of bone at Oxford. *Radiocarbon* 46:155–163.
2. Higham TFG, Jacobi RM, Bronk Ramsey C (2006) AMS radiocarbon dating of ancient bone using ultrafiltration. *Radiocarbon* 48:179–195.
3. Brock F, Ramsey CB, Higham T (2007) Quality assurance of ultrafiltered bone dating. *Radiocarbon* 49:187–192.
4. Brown TA, Nelson DE, Vogel JS, Southon JR (1988) Improved collagen extraction by modified Longin method. *Radiocarbon* 30:171–177.
5. Jacobi RM, Higham TFG, Bronk Ramsey C (2006) AMS radiocarbon dating of Middle and Upper Palaeolithic bone in the British Isles: Improved reliability using ultrafiltration. *J Quarter Sci* 21:557–573.
6. Stuiver M, Polach H (1977) Discussion: Reporting of  $^{14}\text{C}$  data. *Radiocarbon* 19:355–363.
7. Wood RE, Bronk Ramsey C, Higham TFG (2010) Refining the ultrafiltration bone pretreatment background for radiocarbon dating at ORAU. *Radiocarbon* 52:600–611.
8. De Torres T, et al. (2010) Dating of the hominid (*Homo neanderthalensis*) remains accumulation from El Sidrón cave (Piloña, Asturias, north Spain): An example of a multi-methodological approach to the dating of Upper Pleistocene sites. *Archaeometry* 52:680–705.
9. Staff RA, Bronk Ramsey C, Nakagawa TA (2010) A re-analysis of the Lake Suigetsu terrestrial radiocarbon calibration dataset. *Nucl Instrum and Meth B* 268:960–965.

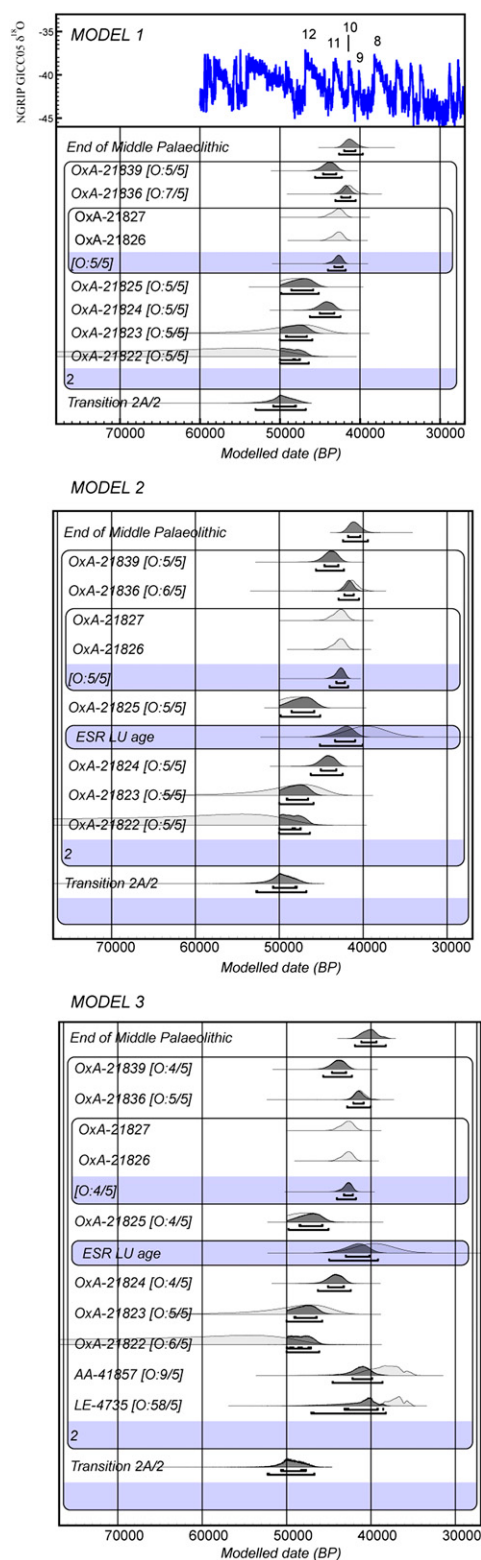

**Fig. S1.** Comparison of three age models for the chronology of the layer 2 occupation at Mezmaiskaya. The three models are described in the text. Modeling was undertaken using the IntCal09 curve of Reimer et al. (1) and OxCal 4.1 software (2). The individual radiocarbon likelihoods are the lighter-shaded distributions. The darker outlines represent the posterior probability distributions, namely the results of the Bayesian modeling. The outlier probabilities are shown in brackets (O:posterior probability/prior probability). One determination in model 3 has a high outlier probability of 58%. The prior outlier probability was set at 0.05 using a t-type outlier model. An SSimple model was used in the modeling of mean data (2). The data are compared against the NGRIP GICC05  $\delta^{18}\text{O}$  record. Greenland interstadials are numbered where they are relevant and are discussed in the text (data from refs. 3 and 4). Note that synchronicity has yet to be demonstrated between Greenland paleoclimate and other parts of the world, so this is a tentative comparison.

1. Reimer PJ, et al. (2009) IntCal09 and Marine09 radiocarbon age calibration curves, 0–50,000 years cal BP. *Radiocarbon* 51:1111–1150.
2. Bronk Ramsay C (2009) Bayesian analysis of radiocarbon dates. *Radiocarbon* 51:337–360.
3. Svensson A, et al. (2006) The Greenland ice core chronology 2005, 15–42 ka. Part 2: Comparison to other records. *Quat Sci Rev* 25:3258–3267.
4. Andersen KK, et al. (2006) The Greenland ice core chronology 2005, 15–42 ka. Part 1: Constructing the time scale. *Quat Sci Rev* 25:3246–3257.

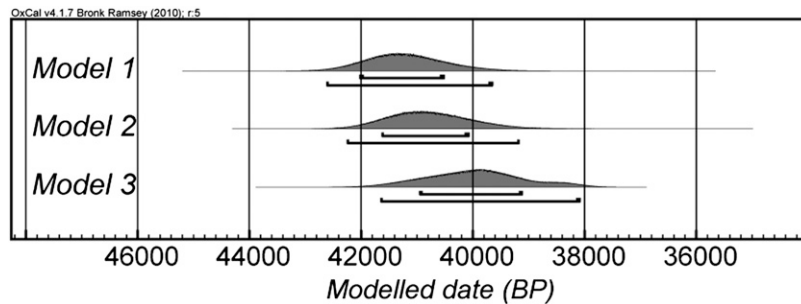

**Fig. S2.** Boundary distributions for the end of the layer 2 occupation (and therefore the latest Mousterian boundary) corresponding to the three Bayesian models analyzed based on the layer 1C and 2 determinations. See text for details. The three models are shown in Fig. S1.

**Table S1. Calibrated age ranges for the Oxford determinations from layer 2, and the direct date of the Mez 2 Neanderthal. See text for details. OxA-21825, -21823, -21822, and -21828 are not included because they are either beyond the current calibration limit or may be beyond it**

|           | Calibrated age ranges<br>in years Cal BP<br>(68.2% probability) |        | Calibrated age ranges<br>in years Cal BP<br>(95.4% probability) |        |
|-----------|-----------------------------------------------------------------|--------|-----------------------------------------------------------------|--------|
|           | From                                                            | To     | From                                                            | To     |
| OxA-21839 | 44,600                                                          | 42,960 | 45,600                                                          | 42,300 |
| OxA-21836 | 41,950                                                          | 40,660 | 42,530                                                          | 39,640 |
| OxA-21827 | 43,470                                                          | 41,970 | 44,440                                                          | 41,440 |
| OxA-21826 | 43,370                                                          | 42,020 | 44,270                                                          | 41,560 |
| OxA-21824 | 45,040                                                          | 43,210 | 46,250                                                          | 42,440 |
| OxA-21829 | 46,380                                                          | 43,990 | 48,650                                                          | 43,130 |
| OxA-21839 | 44,560                                                          | 42,970 | 45,510                                                          | 42,320 |

**Table S2. Calibrated  $^{14}\text{C}$  results for the Upper Paleolithic layers at Mezmaiskaya. These are calibrated using the IntCal09 dataset of Reimer et al. (1)**

| Layer | Sample ( $^{14}\text{C}$ age BP)            | 68.2% probability |        | 95.4% probability |        |
|-------|---------------------------------------------|-------------------|--------|-------------------|--------|
| 1A    | AA-41855 (28,510 $\pm$ 850)                 | 33,950            | 31,800 | 34,750            | 31,350 |
|       | OxA-21814 (21,040 $\pm$ 120)                | 25,400            | 24,900 | 25,600            | 24,600 |
| 1B    | OxA-21818 (14,970 $\pm$ 75)                 | 18,500            | 18,000 | 18,550            | 17,950 |
|       | OxA-21817 (27,000 $\pm$ 250)                | 31,450            | 31,150 | 31,650            | 31,000 |
|       | OxA-21816 (23,310 $\pm$ 160)                | 28,400            | 27,950 | 28,550            | 27,750 |
|       | OxA-21815 (20,790 $\pm$ 120)                | 24,950            | 24,550 | 25,150            | 24,400 |
|       | CURL-5759 (split) (32,400 $\pm$ 230)        | 37,100            | 36,550 | 37,650            | 36,400 |
|       | CURL-5756 (split) (32,400 $\pm$ 240)        | 37,150            | 36,550 | 37,700            | 36,400 |
|       | CURL-5757 (split) (32,000 $\pm$ 250)        | 36,800            | 36,300 | 37,100            | 35,550 |
|       | Mean value of three above 32,284 $\pm$ 139  | 36,850            | 36,550 | 37,200            | 36,400 |
| 1C    | OxA-21821 (27,070 $\pm$ 250)                | 31,500            | 31,150 | 31,700            | 31,050 |
|       | OxA-21820 (34,750 $\pm$ 650)                | 40,550            | 39,000 | 41,350            | 38,550 |
|       | OxA-21819 (20,640 $\pm$ 130)                | 24,900            | 24,450 | 25,050            | 24,250 |
|       | OxA-21105* (28,880 $\pm$ 140)               | 33,700            | 33,050 | 34,450            | 32,900 |
|       | OxA-21104* (28,510 $\pm$ 140)               | 33,250            | 32,650 | 33,400            | 32,150 |
|       | Mean value of * duplicates 28,701 $\pm$ 100 | 33,350            | 32,950 | 33,550            | 32,700 |
|       | AA-41856 (36,100 $\pm$ 2300)                | 43,330            | 38,750 | 46,700            | 36,630 |
|       | GIN-10946 (32,900 $\pm$ 900)                | 38,650            | 36,600 | 40,300            | 35,500 |
|       | CURL-5761§ (33,100 $\pm$ 270)               | 38,450            | 37,350 | 38,650            | 36,900 |
|       | CURL-5760§ (33,000 $\pm$ 240)               | 38,400            | 37,100 | 38,550            | 36,850 |
|       | CURL-5762§ (33,000 $\pm$ 260)               | 38,400            | 37,100 | 38,600            | 36,800 |
|       | Mean value of § duplicates 33,030 $\pm$ 148 | 38,400            | 37,200 | 38,550            | 36,950 |
|       | Beta-113536 (32,010 $\pm$ 250)              | 36,800            | 36,300 | 37,150            | 35,550 |

1. Reimer PJ, et al. (2009) IntCal09 and Marine09 radiocarbon age calibration curves, 0–50,000 years cal BP. *Radiocarbon* 51:1111–1150.
